# Supplementary material for: Continuous flow kinetic resolution of a non-equimolar mixture of diastereoisomeric alcohol using a structured monolithic enzymatic microreactor
Source: Royal Society of Chemistry journal article supplement (doi:10.1039/c8re00177d), 2018-12-21
Supplement: c8re00177d1.pdf [file c8re00177d1.pdf]

## Supporting Information

### Continuous flow kinetic resolution of non-equimolar mixture of diastereoisomeric alcohol using structured monolithic enzymatic microreactor

Daniel Jan Strub<sup>1,2,\*</sup>, Katarzyna Szymańska<sup>3,\*</sup>, Zofia Hrydziuszko<sup>1</sup>, Jolanta Bryjak<sup>1</sup> Andrzej Bolesław Jarzębski<sup>3,4</sup>

<sup>1</sup>*Department of Bioorganic Chemistry, Faculty of Chemistry, Wrocław University of Science and Technology, Wyb. Wyspiańskiego 27, 50-370 Wrocław, Poland*

<sup>2</sup>*Liquid Technologies Ltd, Chelmońskiego 12, 51-630 Wrocław, Poland*

<sup>3</sup>*Department of Chemical Engineering, Silesian University of Technology, M. Strzody 7, 44-100 Gliwice, Poland*

<sup>3</sup>*Institute of Chemical Engineering, Polish Academy of Sciences, Bałtycka 5, 44-100 Gliwice, Poland*

*\*Both authors contributed equally to this work*

#### Table of Contents

**Fig. 1S.** Image of the applied monolithic microreactor.

**Fig. 2S.** Exemplary chromatograms of the mixture of isomers of alcohol (**S/R**)-**1** (green) and pure minor isomer of alcohol (**S**)-**1** (black) and ester (**R**)-**2**.

**Fig. 3S.** Exemplary chromatogram of the mixture after the process showing full conversion of the major isomer of alcohol (**R**)-**1** to the ester (**R**)-**2**.

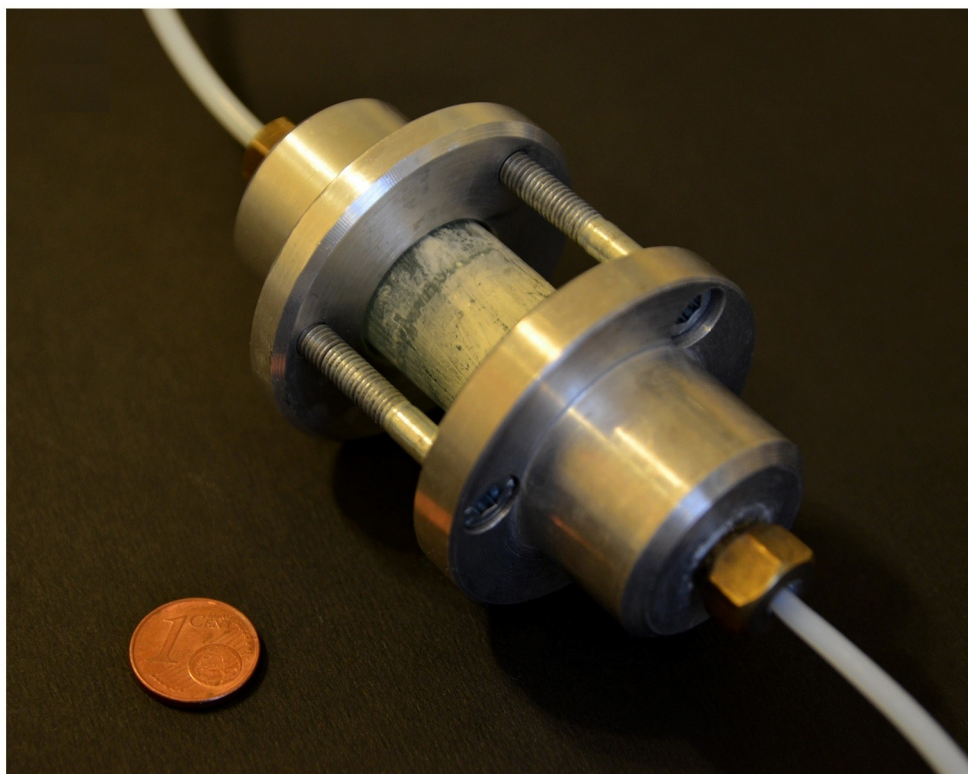

**Fig. 1S.** Image of the applied monolithic microreactor.

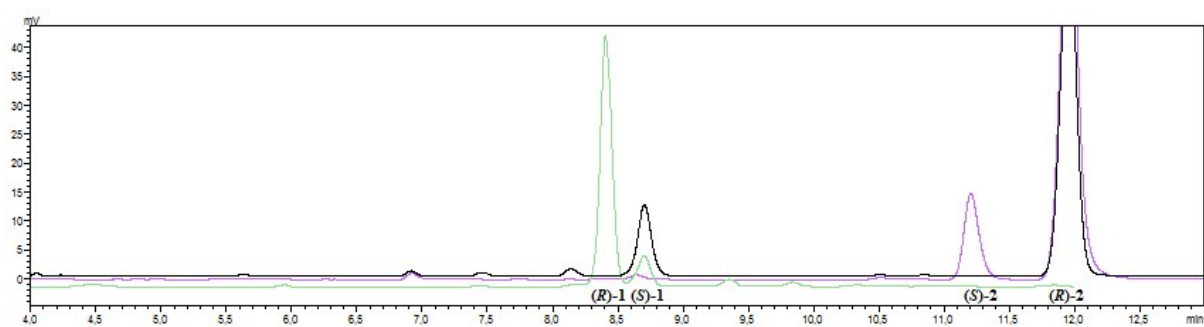

**Fig. 2S.** Exemplary chromatograms of the mixture of isomers of alcohol (*S/R*)-1 (green), ester (*S/R*)-2 (purple) and pure minor isomer of alcohol (*S*)-1 (black) and major isomer of ester (*R*)-2 (black).

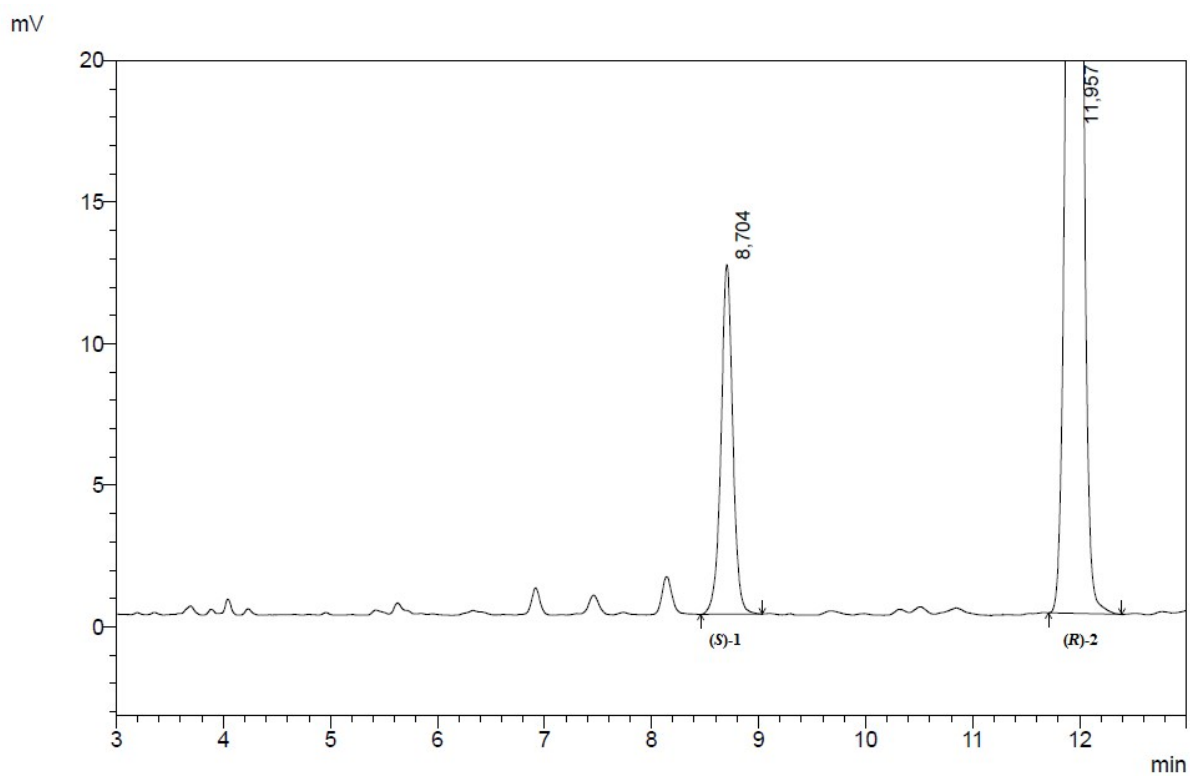

Peak Table

| Peak# | Ret. Time | Area   | Height | Area%   |
|-------|-----------|--------|--------|---------|
| 1     | 8.704     | 94345  | 12330  | 15.011  |
| 2     | 11.957    | 534137 | 62533  | 84.989  |
| Total |           | 628482 | 74863  | 100.000 |

**Fig. 3S.** Exemplary chromatogram of the mixture after the process showing full conversion of the major isomer of alcohol (**R**)-1 to the ester (**R**)-2.
